# Supplementary material for: Harnessing AI for Geosciences Education: A Deep Dive into ChatGPT's Impact
Source: Copernicus journal article supplement (doi:10.5194/gc-2023-7), 2024-01-03
Supplement: Supplementary file [file gc-2023-7-RC1-supplement.pdf]

# Harnessing AI for Geosciences Education: A Deep Dive into ChatGPT's Impact

Subham Patra<sup>1\*</sup>, T Sumit Singha<sup>1</sup>, Megh Kanvinde<sup>1</sup>, Angana Mazumdar<sup>1</sup> and Swastika Kanjilal<sup>1</sup>

<sup>1</sup> Indian Institute of Technology Bombay, Powai, Mumbai 400 076, India

## Abstract

The integration of artificial intelligence language models, particularly ChatGPT, into geosciences education has the potential to transform the learning landscape. This study explores the impact of ChatGPT on geoscience education. The research comprises two phases: first, a survey to understand students' perceptions and usage patterns of ChatGPT, and second, a series of tests to assess its reliability, content generation capabilities, translation abilities, and potential biases.

The survey findings reveal that ChatGPT is gaining popularity among geoscience students, with many using it as a quick information retrieval tool and for content generation tasks. However, students expressed concerns about its accuracy, potential biases, and lack of awareness regarding its limitations. While ChatGPT offers benefits in terms of generating content and streamlining educational tasks, it cannot replace the essential role of human teachers in fostering critical thinking and problem-solving skills. Thus, a balanced approach is crucial. Ethical concerns surrounding ChatGPT include its potential to bypass plagiarism detectors, introduce biases, and raise issues related to data privacy and misinformation. Responsible adoption of AI technologies in education is essential to address these concerns. In conclusion, ChatGPT has the potential to enhance geoscience education, but its implementation should be approached with caution. By understanding its capabilities and limitations, educators can leverage AI technologies to create more engaging, inclusive, and effective learning experiences while upholding academic integrity and ethical standards.

## 1. Introduction

Artificial intelligence language models have recently witnessed a significant rise in popularity, revolutionizing various domains across multiple sectors (Steenbergen-Hu and Cooper, 2014; Zawacki-Richter et al., 2019; Bengio et al., 2021; Xu et al., 2021; Sallam, 2023). These models have proved their capabilities in learning, judgment, and decision-making, making them invaluable. Prominent examples of the AI language models include BERT (Bidirectional Encoder Representations from Transformers) by Google, T5 (Text-to-Text Transfer Transformer) by Google, and ChatGPT (Generative Pre-trained Transformer) developed by OpenAI. These models are pre-trained on vast datasets from the internet, allowing them to develop a generalized understanding of language and context. The large language models have now set and continue to achieve new benchmarks in natural language processing, empowering computers to process, understand, and generate human-like text.

ChatGPT (Generative Pre-trained Transformer) developed by OpenAI stands out at present as an influential AI language model and has gathered considerable attention since its inception (30<sup>th</sup> November 2022 – initial release date; <https://openai.com>). It builds upon the foundation set by its predecessor GPT-3, offering significant improvements in generating contextually relevant and coherent responses resembling natural human dialogue. ChatGPT has had a humongous impact on conversational AI, evident in its enhanced natural language understanding, personalization capabilities, multilingual support, and ability to boost user engagement. OpenAI has made an open-source version of ChatGPT available, allowing developers and researchers to integrate into numerous fields to enhance various processes. In addition, the company has been actively working on the next iteration, GPT-4 which is expected to offer even more sophisticated language understanding and generation capabilities (including image and voice inputs).

55 The potential applications of ChatGPT in the education sector are vast and hold promising prospects  
56 for both students and educators (Zhai, 2022; Sallam, 2023; Kasneci et al., 2023). The chatbot's  
57 capabilities are broad and versatile - ranging from tasks like question-answering, language translation,  
58 text summarization, etc. (Gilson et al., 2023; Hargreaves, 2023; Jiao et al., 2023) – making it a  
59 complete education and research assistant for students. In this study, we aim to investigate the impact  
60 of ChatGPT in the geoscience sector. Geoscience education - a specialized field centered on the study  
61 of Earth's structure, processes, and history - plays a pivotal role in understanding our planet's past,  
62 present, and future. Unlike most educational disciplines, geoscience education presents unique  
63 challenges and opportunities due to its reliance on visualizations, hands-on fieldwork, and the need  
64 for scientific precision. Given these characteristics of geoscience education, the introduction of AI  
65 language models like ChatGPT holds significant promise in terms of data analysis, visual  
66 interpretations, and scientific communication. Moreover, ChatGPT's availability at any time allows  
67 students to seek help and clarification outside of traditional classroom hours, enhancing their learning  
68 experience. In this study, we aim to investigate how ChatGPT's capabilities can/should be harnessed  
69 to improve geoscience education through the following objectives:

- 70 i. Surveying geoscience students to assess their familiarity with ChatGPT and its features  
71 relevant to geoscience education. Additionally, determining their usage frequency,
- 72 ii. Testing these features for their accuracy, reliability, and fidelity,
- 73 iii. Providing a comprehensive overview of the usability and limitations of ChatGPT in  
74 geoscience education.

## 76 2. Methods

77  
78 This ~~entire~~ research was conducted in two phases. The first phase included surveying students to  
79 understand their insights of ChatGPT and its applicability and the final phase included testing out  
80 these features and comparing them with the general perception. The survey was conducted among

81 geoscience students in Mumbai, India, focusing on those who were active during and after November  
82 2022 (the initial release date of ChatGPT). Participants belonged to three major institutes in Mumbai  
83 that offer courses in geosciences, namely: Indian Institute of Technology, Bombay, St. Xavier's  
84 College, and K J Somaiya College of Science and Commerce. Anonymous responses were collected  
85 to maintain the authenticity in data. A total of 94 geoscience students took part in the survey, which  
86 consisted of 20 questions that aimed to assess their awareness of the model and the frequency of its  
87 usage. Open-source software accessible to the surveyed students was primarily utilized in the study  
88 to ensure accessibility and reliability.

89

90 The reliability of ChatGPT's most used feature – answering questions – was assessed by presenting  
91 conceptual and problem-solving questions in geosciences. Additionally, ChatGPT was prompted to  
92 attempt questions from the Graduate Aptitude Test in Engineering (GATE) examinations (questions  
93 of years 2016, 2018, 2019, 2021). The GATE examination is designed to evaluate a comprehensive  
94 understanding of engineering and science for admission into Master's programs in reputed institutes  
95 of the country and recruitment by some public sector companies. However, due to the limitations of  
96 the free version of ChatGPT, which cannot accept images as prompts, some questions could not be  
97 attempted. Moreover, one section that contains aptitude questions (unrelated to geoscience) was  
98 excluded.

99

100 To evaluate ChatGPT's performance in content generation (infamously used by students to complete  
101 assignments requiring mere text generation), the model was asked to generate 200 essays on various  
102 genres of geology, such as sedimentology, metamorphic petrology, structural geology, etc. All essays  
103 were then assessed for plagiarism using the Grammarly software (Dong and Shi, 2021;  
104 <http://grammarly.com>). Additionally, the essays were tested using GPTZero, a classification model  
105 designed to detect whether a document was written by a large language model (<http://gptzero.me>).  
106 GPTZero was trained on diverse human-written and AI-generated text, with a focus on English prose.

107 While GPTZero's accuracy may vary across different use-cases, it has been endorsed as one of the  
 108 most reliable AI detectors by multiple independent sources, including TechCrunch. Further, repeated  
 109 analysis (20 times) of the same essay on GPTzero revealed that it is highly precise with its responses,  
 110 giving the same response every time. It also proved to be efficient in detecting human-generated texts  
 111 as it successfully recognized them correctly 20 times.

112  
 113 ChatGPT's writing ability was tested by making it re-write 50 abstracts from published research  
 114 articles. Text scores provided by Grammarly were used to compare the original and modified articles  
 115 for linguistic accuracy and quality. A metric 'improved%' was calculated with the formula  
 116 "Improved% = (Modified rating - Original rating/Original rating) \*100. Furthermore, the model's  
 117 translation (Jiao et al., 2023) ability was assessed by translating English words, sentences, and  
 118 paragraphs to Hindi using its inherent features. Google Translate was utilized for comparison  
 119 purposes. The translated content was reviewed for accuracy by two authors fluent in Hindi. In  
 120 addition, the model was subjected to bias testing by presenting questions that could have multiple  
 121 answers, to assess the potential bias in the content it generates.

### Survey Response on ChatGPT Collected from 94 Students

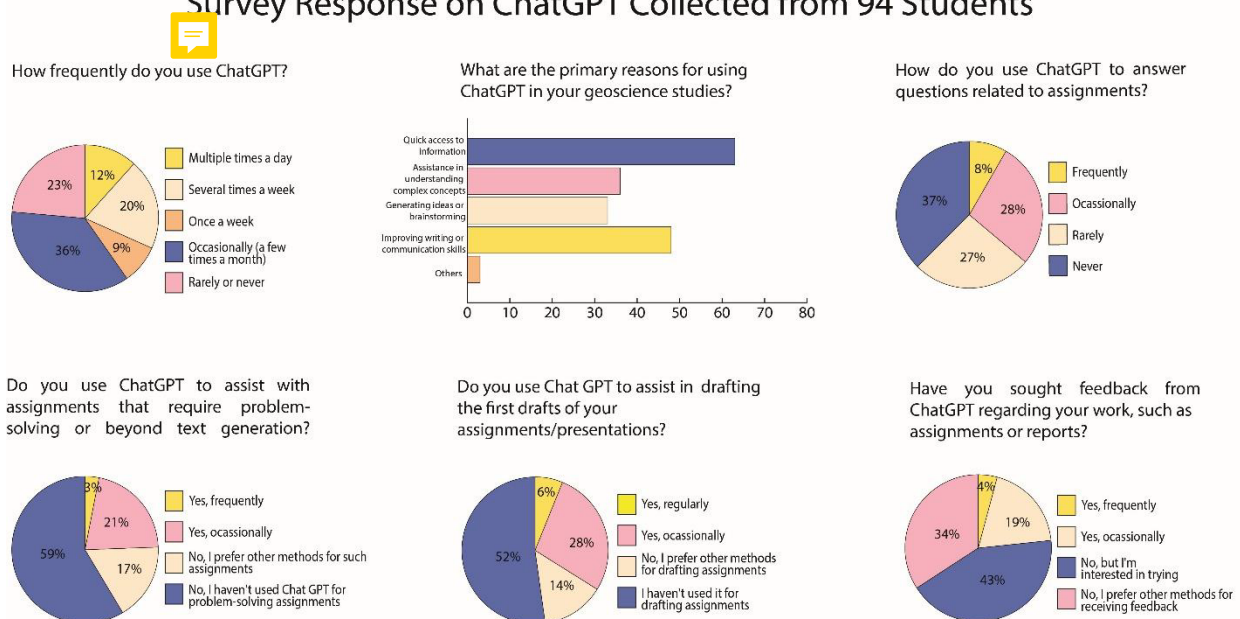

122  
 123 Figure 1 Survey Results depicting ChatGPT Utilization in Geosciences among 94 Student Respondents. Many favor frequent use for  
 124 quick info, but potential for problem-solving remains largely unexplored, highlighting untapped opportunities for its application in  
 125 academia.

## Survey Response on ChatGPT Collected from 94 Students

How often do you rely on ChatGPT to answer questions during your self study sessions?

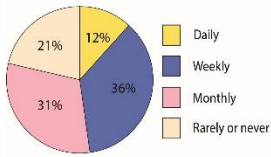

Do you find ChatGPT helpful for checking your understanding of concepts?

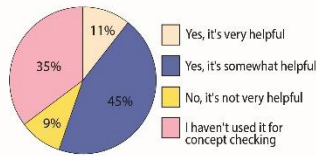

Have you utilized ChatGPT for exam preparation?

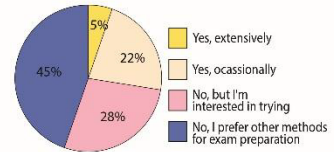

In your experience, how often does ChatGPT generate incorrect or false information?

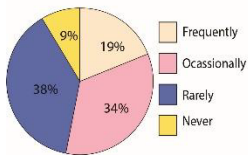

Do you believe that ChatGPT relies on biased data?

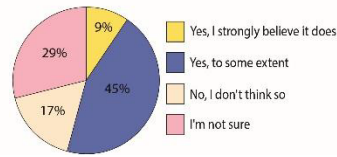

How confident are you that ChatGPT possesses up-to-date knowledge?

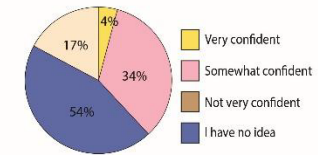

126  
127  
128  
129

Figure 2 Survey Results depicting ChatGPT Utilization in Geosciences among 94 Student Respondents. In Mumbai, geoscience students frequently use ChatGPT for self-study, but they have reservations about its accuracy, potential data bias, and knowledge limitations when it comes to exam preparation.

## Survey Response on ChatGPT Collected from 94 Students

What are your thoughts on using ChatGPT to bypass plagiarism detectors?

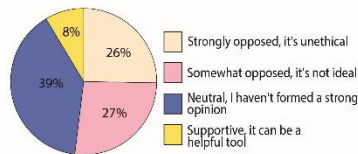

Would you like your teachers to utilize ChatGPT for generating course material?

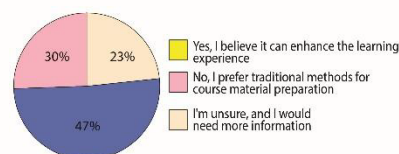

How comfortable would you be if assessment tasks were generated using ChatGPT?

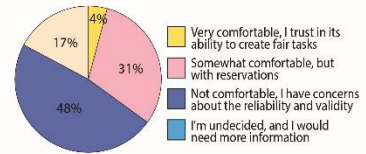

In your opinion, should ChatGPT be used to evaluate student performance?

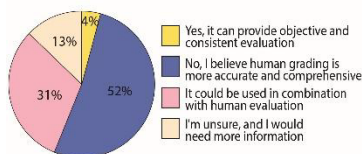

Do you believe ChatGPT can fully replace the role of a human teacher in your geoscience studies?

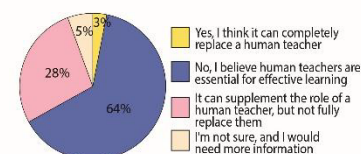

Has the usage of ChatGPT improved your productivity in geoscience studies?

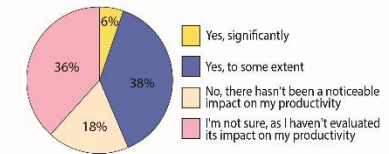

130  
131  
132

Figure 3 Ethical Perspectives on AI in Academia: Majority of students oppose AI-generated texts evading plagiarism detection, prefer traditional teaching methods, and consider human teachers indispensable, yet appreciate ChatGPT's productivity boost.

### 3. Results

#### 3.1 Phase 1: Survey Insights of ChatGPT and Its Applicability

133  
134  
135  
136  
137

A survey was conducted among 94 geoscience students who were active during the release of ChatGPT or after it. The survey aimed to assess the frequency of ChatGPT usage, participants'

138 awareness of its features, and their perspectives on its potential use for teaching purposes (Fig. 1,2,3;  
139 Supplementary file S2).

140  
141 Findings from the survey revealed that 12% of the students reported using ChatGPT frequently, while  
142 approximately 36% were occasional users (Fig. 1). The primary reasons cited for using the AI tool  
143 were quick access to information (63) and improvement in writing and communication skills (48).  
144 Regarding academic use, around 64% of the students admitted to either not using ChatGPT or using  
145 it rarely to answer questions related to assignments (Fig. 1). Furthermore, a significant proportion  
146 (59%) of the participants were unaware that ChatGPT could be utilized for tasks beyond simple text  
147 generation, such as problem-solving (Fig. 1). An interesting feature of ChatGPT is its capability to  
148 generate drafts for assignments, presentations, and talks (Choi et al., 2023). However, 52% of the  
149 students reported not using this feature (Fig. 1). Additionally, only 23% of the participants used  
150 ChatGPT to receive feedback on their provided documentation (Cotton et al., 2023), with 34%  
151 preferring other methods (Fig. 1). During self-study sessions, approximately 48% of the geoscience  
152 students in Mumbai reported using ChatGPT at least weekly, and 56% of them found it very useful  
153 (Fig. 2). However, around 45% of the students did not use the tool during exam preparation, although  
154 28% expressed interest in using it for this purpose (Fig. 2).

155  
156 When questioned about the accuracy of the AI bot, 53% of the students encountered instances where  
157 ChatGPT produced incorrect results (Fig. 2). Moreover, 54% of the participants believed that the  
158 model relied on biased data (Fig. 2). Notably, ChatGPT's knowledge was limited to data up to  
159 September 2021, a fact acknowledged by the bot itself, but 61% of the students expressed uncertainty  
160 or were unaware of this limitation (Fig. 2). Regarding ethics in academia, 53% of the students opposed  
161 the idea of AI-generated texts bypassing plagiarism detectors (Khalil and Er, 2023), while 39% had  
162 a neutral opinion on the matter (Fig. 3). ChatGPT's translation feature (Jiao et al., 2023) was utilized  
163 by only 31% of the students, with 18% preferring other methods for translation. In terms of teaching

164 preferences, a majority of students preferred traditional teaching methods (not involving AI) for  
165 course material generation (47%), assessment task preparation (48%), and grading (52%)  
166 (Supplementary file S1). Additionally, 64% of the participants strongly believed that human teachers  
167 were essential for effective learning and that chatbots could not replace them (Fig. 3). Finally, around  
168 44% of the students admitted that ChatGPT had improved their productivity while studying  
169 geosciences (Fig. 3).

170

## 171 **3.2 Phase 2: Testing ChatGPT Features**

172

### 173 **3.2.1 Reliability Assessment of ChatGPT's Question-Answering Feature**

174

175 ChatGPT's capability to function as a search engine and explain conceptual questions in geology was  
176 tested to assess its accuracy and usefulness for self-study by students. The results of these exercises  
177 revealed both strengths and limitations in this feature.

178

179 When asked basic conceptual questions on geology, ChatGPT provided correct and well-structured  
180 explanations, demonstrating its effectiveness as a self-study tool for students. Its ability to explain  
181 complex concepts in a clear manner can be valuable for enhancing students' understanding. A critical  
182 limitation observed during the exercises was ChatGPT's inability to generate images. In geology,  
183 where visual representations are often essential for comprehension, this limitation hinders the model's  
184 effectiveness in providing a comprehensive learning experience. When asked to generate the  
185 geological time scale, ChatGPT displayed high inaccuracy, mislabeling time units, and omitting  
186 important information in many instances (Supplementary file S2). This inaccuracy raises concerns  
187 regarding the reliability of the information provided for important geological concepts. ChatGPT was  
188 tasked with generating references on specific geological topics. The results showed mixed accuracy,  
189 with some references being incorrect and fake. For instance, when asked to provide references on



190 end-Cretaceous stress environments, three out of five references were wrong and not genuine  
 191 (Supplementary file S2). Similarly, for scientific articles discussing the role of carbon isotopes in  
 192 interpreting the 'big five' mass extinctions, five out of ten references were incorrect (Supplementary  
 193 file S2).

Number of yearwise GATE questions attempted correctly and incorrectly by ChatGPT

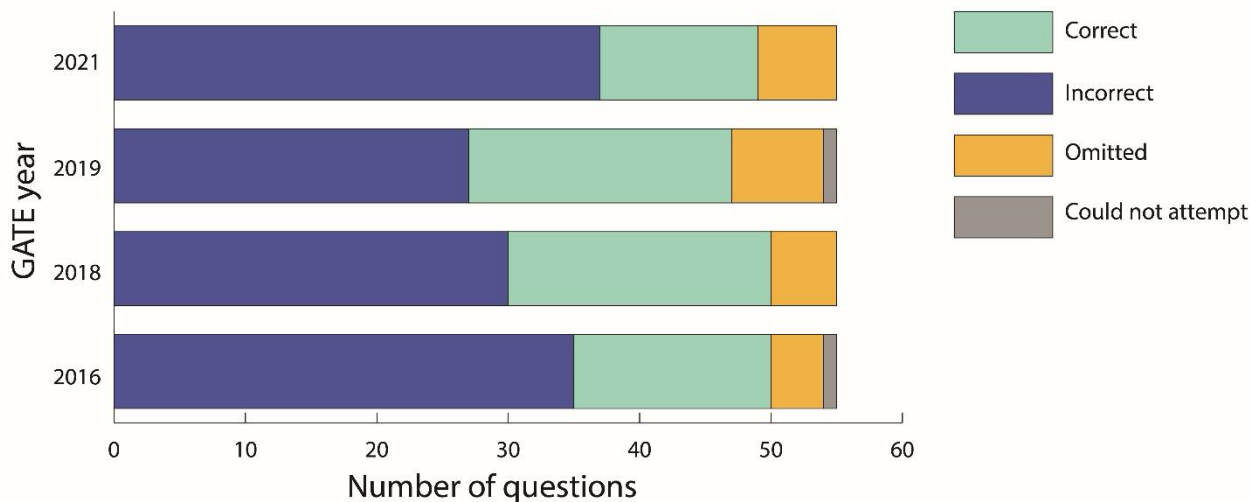

\*Questions marked as "omitted" have not been included as they contain diagrams required to answer them. The version of ChatGPT used in this study does not accept multimedia in the questions, nor does it include multimedia in its responses. The diagrams mentioned here are either in the question or the given answer choices.

\*The questions marked as "could not attempt" are the ones where ChatGPT explicitly stated that it could not answer the question because of insufficient data.

194

195 Figure 4 ChatGPT's performance in GATE Questions: Stacked bar graph illustrating correct and incorrect answers, highlighting its  
 196 struggles in problem-solving with a 20.4% accuracy rate.

197 ChatGPT's performance in solving GATE examination questions was evaluated, and it scored poorly  
 198 with an average of 36.44% (Highest score – 41.6%, 2018; lowest score- 29.4%, 2021). The model  
 199 struggled particularly with questions that required problem-solving, such as numericals, achieving  
 200 only a 20.4% accuracy rate (Fig. 4; Supplementary file S3).

201

### 202 3.2.2 Content Generation Performance Evaluation

203

204 The content generation feature of ChatGPT emerged as the most utilized by geoscience students,  
 205 especially for generating content related to assignments, scripts, and during self-study sessions. To  
 206 evaluate the performance of this feature, two exercises were conducted, each focusing on different  
 207 aspects of content generation.

GPT Zero response on ChatGPT content

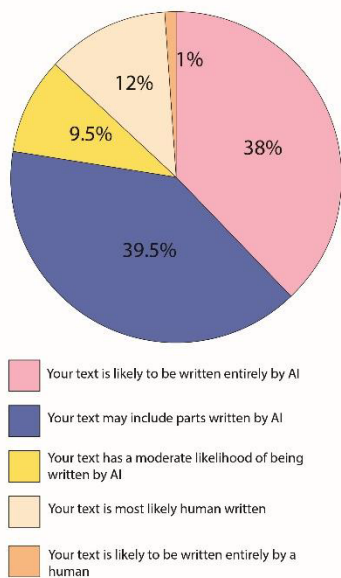

Histogram of Plagiarism score (Grammarly)

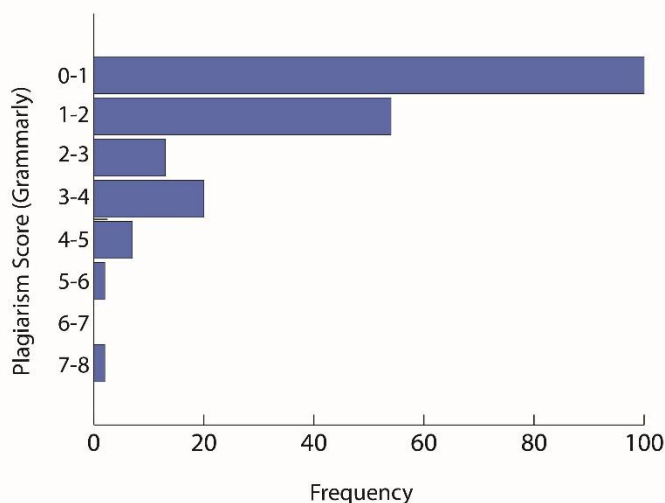

208

209

210

211

Figure 5 Assessing ChatGPT's Content Generation: A pie chart showcasing GPT Zero responses reveals the accuracy in detecting AI-generated content. Furthermore, a histogram of plagiarism scores for the same essays illustrates the low level of plagiarism in ChatGPT's content.

212

ChatGPT was prompted to generate 200 essays covering various topics across different domains of

213

geosciences (Fig. 5; Supplementary file S4). The essays were subsequently analyzed for plagiarism

214

using Grammarly's built-in features. The results showed an average plagiarism rate of 1.46%,

215

indicating a low level of plagiarised content in the generated essays. Most essays had minimal or no

216

plagiarism, with 51% having less than 1% copied content and 94.5% having less than 4% copied

217

content. To further evaluate the authenticity of the generated content, GPTZero, a classification model

218

for detecting AI-generated text, was employed. According to GPTZero's analysis, approximately 78%

219

of the essays were successfully identified as either entirely generated by AI or containing AI-

220

generated portions. However, interestingly, around 12% of the essays were identified as mostly

221

written by humans, showcasing the model's capability to produce human-like content. It is worth

222

noting that only 1% of the essays were mis-detected as entirely written by humans.

223

224

Published abstracts (100) were modified using ChatGPT, and their Grammarly Scores were compared

225

before and after the modifications (Fig. 6; Supplementary file S4). The results indicated that most

226

abstracts (91%) showed an improvement in their Grammarly Scores after being modified by

227 ChatGPT. The average improvement observed throughout the abstracts was 16.21%. An intriguing  
228 observation was that ChatGPT significantly improved the writing of poorly written texts (with low  
229 initial Grammarly Scores), thus following an exponential curve for improvement. All the abstracts  
230 that would not get improved later or showed minor improvements, originally had a score of more  
231 than 80, suggesting that the model is more effective in enhancing poorly written texts.

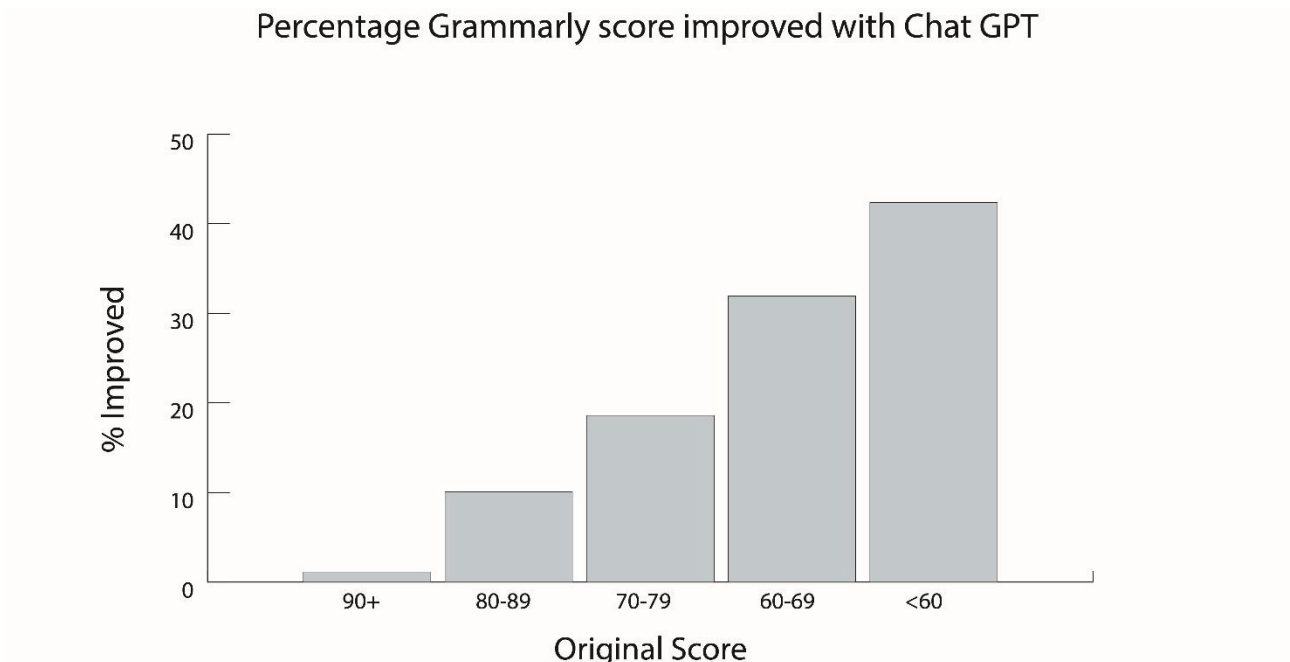

232  
233 Figure 6 ChatGPT's impact on content quality enhancement. Analysis of Grammarly Scores before and after ChatGPT modifications  
234 reveals a 16.21% average improvement, with notable effectiveness in enhancing poorly written texts, as demonstrated by a significant  
235 improvement in previously low-scoring abstracts.

236

### 237 3.2.3 Translating Ability Assessment

238

239 To evaluate ChatGPT's translating service, we tested its ability to translate geological words and  
240 sentences from English to Hindi, which is commonly spoken in Mumbai and India. The translations  
241 were assessed using the metrics 'Accurate,' 'Moderate,' and 'Poor' to comment on the quality of the  
242 translations. Out of the geological words translated, 54% of them were accurately translated, meaning  
243 the Hindi translations were correct and aligned with their intended meanings (Supplementary file S5).  
244 However, a notable concern was that 26% of the translations were categorized as 'Poor,' indicating  
245 incorrect translations. Moreover, 20% of the translations were classified as 'Moderate,' implying that

246 although the translations were somewhat correct, they were not entirely accurate and might have  
247 slightly deviated from their intended meanings. For the translation of English sentences related to  
248 geological terms, only 60% of the sentences were 'Accurately' translated, where the Hindi translations  
249 correctly conveyed the intended meanings of the sentences (Supplementary file S5). A concerning  
250 observation was made in 38% of the sentences, where ChatGPT did not translate critical terms and  
251 instead used them as they were, in English. This failure to translate crucial terms hinders the overall  
252 effectiveness of the translated sentences.

253

#### 254 3.2.4 Bias Testing

255

256 ChatGPT's training process involves learning from a vast range of internet text, including articles,  
257 books, and websites, capturing both factual information and subjective perspectives available online.  
258 As with any AI language model, the training data can potentially include biased language or reflect  
259 existing biases present in society.

260

261 To assess ChatGPT's response accuracy and potential biases in the context of geosciences, two  
262 exercises were conducted. These exercises highlight the importance of understanding potential biases  
263 and limitations in AI language models like ChatGPT when dealing with subject areas that can have  
264 diverse perspectives and interpretations. In the first exercise, the model was asked to generate ten  
265 references of scientific articles discussing the role of carbon isotopes in interpreting the 'big five' mass  
266 extinctions (Supplementary file S2). However, the response exhibited some bias, as six out of the ten  
267 references focused solely on the Permian-Triassic mass extinction. An unbiased response should have  
268 contained references from articles discussing at least one of each of the 'big five' mass extinctions,  
269 providing a more balanced representation.

270

271 The second exercise involved asking ChatGPT about the cause of the Cretaceous-Paleogene boundary  
272 mass extinction, a topic with two competing schools of thought (Supplementary file S2). One group  
273 supports an asteroid impact as the cause (Schulte et al., 2010), while the other advocates for the  
274 Deccan volcanism hypothesis (Keller et al., 2020). The model predominantly discussed the asteroid  
275 impact and its repercussions as the primary cause of the mass extinction in five out of six short  
276 paragraphs. Only in the end, it briefly mentioned volcanic activity and long-term environmental  
277 changes as contributing factors. An unbiased response would have evenly presented both possible  
278 causes and perhaps included a note about the prevailing opinion regarding the event's cause.

279

## 280 4. Discussion

### 281 4.1 Benefits and limitations of ChatGPT in geoscience education

282

283 In recent years, the development of large language models, including the widely used ChatGPT, has  
284 revolutionized various domains, including education (Farrokhnia et al., 2023; Lo, 2023; Elbanna and  
285 Armstrong, 2023; Li et al., 2023). These transformer-based models have been pre-trained on massive  
286 datasets of text, enabling them to generate human-like text, answer questions, and assist with  
287 translation and summarization (Lo, 2023). In the field of geosciences, where understanding complex  
288 processes and historical events requires significant imagination and critical thinking, such models  
289 hold great potential to play a vital role in education. However, it is essential to examine their  
290 capabilities and limitations to ensure their effective use in geoscience education. Our study focused  
291 on understanding geoscience students' perceptions and usage patterns of ChatGPT in Mumbai, India  
292 (Fig. 1,2,3). The results revealed that approximately 32% of geoscience students admitted to using  
293 the chatbot several times a week, indicating its growing popularity among students in a metropolitan  
294 city like Mumbai.

295

296 The majority of students found the chatbot useful as a 'search engine' to quickly access information,  
297 outperforming traditional methods like Google Search due to its interactive nature and concise  
298 responses (Fig. 1). Nevertheless, our findings highlighted several limitations that warrant careful  
299 consideration. ChatGPT's responses lacked proper scientific references, and inaccuracies were  
300 observed, with instances of the model generating non-existent article references and bibliographic  
301 details (Sect. 3.2.1). Such concerns have been previously reported in the literature, indicating the need  
302 for caution when relying on ChatGPT for academic tasks in specialized domains like geosciences.  
303 Additionally, ChatGPT's performance in solving GATE examination questions was found to be  
304 moderate, particularly struggling with numerical-based questions, with only 20.4% accuracy (Fig. 4).  
305 This emphasizes the importance of cross-referencing and validating information from alternative  
306 sources when dealing with critical assessments and evaluations.

307

308 On a positive note, ChatGPT exhibited excellence in content generation and language editing (Fig.  
309 5,6). The model generated well-written texts with improved Grammarly scores, showcasing its  
310 potential as a valuable tool for enhancing students' writing and communication skills. Moreover, its  
311 translating ability equaled traditional services like Google's, given its human-like communication  
312 capabilities (Supplementary S5).

313

314 However, an important aspect that demands attention is biases in ChatGPT's responses (Tlili et al.,  
315 2023; Baidoo-Anu and Owusu Ansah, 2023). The model's reliance on a large corpus of data can lead  
316 to biased outcomes, with responses disproportionately focused on specific contents, such as the  
317 Permian-Triassic mass extinction and the impact as the cause of the fifth mass extinction in our  
318 examples (Sect. 3.2.4). This bias could stem from the prevalence of certain topics in the training data,  
319 possibly influenced by the availability of published literature and media coverage. , raising concerns  
320 about the reliability of responses on certain topics. Future research could quantify data sources to  
321 better understand and address bias in AI language models like ChatGPT.

322

323 Over-reliance on AI, including ChatGPT, may hinder the development of essential skills like critical  
324 thinking, problem-solving, imagination, and research abilities in students. Worryingly, a considerable  
325 percentage of students were unaware of the possibility of biased (46%), incorrect (47%), and outdated  
326 (62%) responses from ChatGPT, highlighting the need for educational institutes to conduct awareness  
327 sessions (Fig. 2). Promoting responsible usage and critical evaluation of AI language models will  
328 help students harness the benefits while being mindful of the limitations.

329

#### 330 **4.2 Pedagogical considerations**

331

332 The introduction of large language models like ChatGPT has ushered in a new era of technological  
333 advancement in education. As technology continues to evolve rapidly, it inevitably impacts education  
334 systems worldwide, prompting educators to explore the implications of incorporating AI technologies  
335 into teaching and learning processes (Ausat, 2023). ChatGPT, as a powerful artificial intelligence  
336 system capable of processing and generating sophisticated text, has the potential to revolutionize the  
337 traditional classroom dynamic and raise critical questions about the role of teachers in the learning  
338 process (Ausat et al., 2023; Fauzi et al., 2023).

339

340 Teachers play multifaceted roles beyond being instructors, serving as mentors and role models for  
341 students (Zen et al., 2023). The introduction of ChatGPT and other AI technologies into the  
342 geosciences educational landscape has the potential to complement and augment these roles in various  
343 ways. One of the notable contributions of ChatGPT lies in its ability to provide high-quality reading  
344 materials tailored to students' comprehension levels (Kasneci et al., 2023). By processing natural  
345 language, ChatGPT can produce texts that are easy to understand, making it a valuable tool for  
346 teachers in creating customized learning experiences. 23% of the students did show interest in  
347 enhancing their learning experience through this human-AI collaboration (Fig. 3). Additionally, the

348 AI model can automatically generate questions and tests that match students' proficiency levels,  
349 streamlining the assessment process (Cooper, 2023; Tlili et al., 2023). This can save teachers time  
350 and effort while providing relevant and differentiated assessments for students. ChatGPT also holds  
351 promise in supporting research and writing tasks. It can aid teachers in identifying and correcting  
352 errors, highlighting grammatical inconsistencies, and suggesting personalized improvement  
353 strategies. Furthermore, the AI model can generate summaries and outlines of complex texts, assisting  
354 educators in emphasizing key points for further exploration and understanding. It can also be  
355 instrumental in identifying areas where students are struggling, facilitating targeted instruction for  
356 their improvement. However, a large proportion of students (53%) currently doubt the validity and  
357 reliability of AI generated assessments (Fig. 2).

358

359 While ChatGPT's potential to streamline various educational tasks is evident, it is important to  
360 recognize its limitations. The AI model can only generate text-based responses and lacks the ability  
361 to provide live explanations or real-time examples, which are inherent to human teachers' interactions  
362 with students (Herft, 2023). Consequently, ChatGPT's usage should be seen as an adjunct to, rather  
363 than a replacement for, the vital role teachers play in fostering critical thinking, problem-solving, and  
364 creativity in students. Thankfully, most of the students (~64%) believe that human teachers are  
365 essential for effective learning (Fig. 3).

366

367 As educators embrace the integration of technology in the classroom, they must be proactive in  
368 upskilling their competencies and practices to effectively leverage AI's benefits (Haleem et al., 2022).  
369 ChatGPT, as a powerful tool, necessitates thoughtful design strategies to balance human and machine  
370 intelligence in collaborative learning environments. This demands investigation into how teachers  
371 can effectively work together with large language models to achieve desired learning objectives  
372 (Salas-Pilco et al., 2022). Furthermore, educators need to explore innovative ways of using ChatGPT  
373 and other AI technologies to promote personalized learning experiences (Hwang & Chang, 2021). By



374 using AI-generated adaptive feedback and course materials, teachers can better cater to students'  
375 individual needs and learning preferences. Moreover, they can use large language models to create  
376 targeted practice problems and quizzes, ensuring students achieve mastery in the subject matter. As  
377 the adoption of AI in education continues to evolve, future research should focus on understanding  
378 the potential of large language models in supporting teaching practices. Investigating different  
379 human-machine collaboration strategies will be crucial in harnessing the benefits of AI while  
380 preserving the essential human touch in the teaching-learning process. The aim should be to strike a  
381 balance between AI assistance and human interaction, resulting in more engaging, inclusive, and  
382 effective learning experiences for students.

383

### 384 **4.3 Ethical and societal implications**

385

386 The integration of AI, particularly generative AI like ChatGPT, into educational settings raises  
387 numerous ethical concerns that have garnered attention from international organizations and  
388 researchers (Tlili et al., 2023; Lo et al., 2023). Among the critical concerns identified, one issue stands  
389 out prominently - the potential for AI-generated texts to bypass plagiarism detectors, an alarming fact  
390 supported by our research, which indicates that around 50% of students do not support the notion that  
391 AI-generated texts can circumvent plagiarism detection measures (Fig. 3). This phenomenon poses a  
392 significant threat to academic integrity and the fundamental purpose of assessment, which is to  
393 evaluate students' original work and knowledge accurately. The implications of AI-generated content  
394 being undetectable by plagiarism detection applications (e.g., Turnitin and iThenticate) have serious  
395 consequences, as students using ChatGPT can obtain an unfair advantage over their peers who put in  
396 genuine efforts to produce original work (Bašić et al., 2023; Cotton et al., 2023). Furthermore,  
397 instructors find it challenging to evaluate and follow up on students' learning progress when AI-  
398 generated content is involved, potentially undermining the overall effectiveness of the educational  
399 system.

400

401 Beyond the issue of plagiarism, the implementation of AI in education also brings to light concerns  
402 about bias and inequalities. AI-assisted chatbots like ChatGPT can inadvertently perpetuate biases  
403 present in the training data, leading to the reinforcement of existing inequalities in education (Zhai,  
404 2022). This raises ethical questions about ensuring fairness and equal opportunities for all students  
405 and highlights the need for developing AI systems that are free from inherent biases and  
406 discrimination. Another significant ethical consideration is the privacy and security of students' data.  
407 AI technologies collect and process vast amounts of data from users, including students, to improve  
408 their performance. However, there are valid concerns about how this data is utilized, stored, and  
409 protected. Safeguarding students' privacy and ensuring the secure handling of their data is of utmost  
410 importance to maintain trust in AI technologies in educational environments.

411

412 Furthermore, the potential for AI-generated content to contain errors or even fake information raises  
413 ethical questions regarding the dissemination of misinformation in scientific publications and  
414 academic work (Tlili et al., 2023; Liebreuz et al., 2023). While ChatGPT's responses are not exact  
415 copies of specific texts, their similarity to existing sources can lead to misleading content. This  
416 emphasizes the necessity of developing ethical guidelines for the use of AI in education to promote  
417 accuracy and credibility in academic work.

418

419 Despite these concerns, it is essential to acknowledge the positive aspects of integrating AI in  
420 education. ChatGPT and similar AI technologies have the potential to enhance instruction delivery  
421 and learning practices, benefitting both teachers and students in various educational tasks, such as  
422 preparing teaching materials, creating quizzes, and offering personalized learning experiences  
423 (Kasneci et al., 2023). However, balancing the advantages with the ethical challenges is essential.  
424 The decision by New York City to ban ChatGPT in schools due to concerns about cheating in  
425 homework and assignments highlights the need for careful consideration and responsible use of AI

426 technologies in educational contexts ([The Guardian, 2023](#)). Rather than outright bans, engaging in  
427 informed discussions and collaborating with experts from different fields, including education,  
428 security, and psychology, is crucial to fostering a deeper understanding of AI's implications and  
429 responsible adoption of chatbots like ChatGPT.

430

## 431 **5. Conclusions**

432

433 The integration of artificial intelligence language models like ChatGPT into geosciences education  
434 presents both opportunities and challenges. Our study aimed to explore the impact of ChatGPT on  
435 geoscience education, particularly among students in Mumbai, India. The findings revealed that  
436 ChatGPT is gaining popularity among geoscience students, with many utilizing it as a search engine  
437 for quick access to information and for content generation tasks.

438

439 However, the study also highlighted several limitations and ethical concerns that need to be  
440 addressed. ChatGPT's responses lacked proper scientific references, and inaccuracies were observed  
441 in some instances, raising concerns about the reliability of the information provided. Additionally,  
442 biases in the model's responses were evident, which can have implications for academic integrity and  
443 the reinforcement of existing inequalities in education.

444

445 Pedagogically, ChatGPT can be a valuable tool for educators to provide customized learning  
446 experiences and streamline various educational tasks. However, it is crucial to recognize that AI  
447 cannot replace the vital role of human teachers in fostering critical thinking, problem-solving, and  
448 creativity in students.

449

450 Ethically, there is a need for guidelines to address concerns about plagiarism, bias, data privacy, and  
451 the dissemination of misinformation. Responsible use of AI technologies in education should be

452 promoted, and educators must be proactive in upskilling to effectively leverage AI's benefits while  
453 mitigating its limitations.

454

455 In conclusion, ChatGPT holds promise in enhancing geosciences education, but its implementation  
456 should be done thoughtfully and responsibly. By understanding its capabilities and limitations,  
457 educators can leverage AI technologies to create more engaging, inclusive, and effective learning  
458 experiences for students while maintaining academic integrity and ethical standards.

459 **Author Contribution**

460

| <b>Contributor role</b> | <b>Contributors</b>                                            |
|-------------------------|----------------------------------------------------------------|
| Conceptualization       | Subham Patra, T Sumit Singha, Megh Kanvinde                    |
| Data curation           | Subham Patra, T Sumit Singha, Megh Kanvinde, Swastika Kanjilal |
| Formal analysis         | Subham Patra, Megh Kanvinde                                    |
| Funding acquisition     | Subham Patra                                                   |
| Investigation           | Subham Patra                                                   |
| Methodology             | Subham Patra, Megh Kanvinde, T Sumit Singha, Swastika Kanjilal |
| Project administration  | Subham Patra                                                   |

|                                      |                                                              |
|--------------------------------------|--------------------------------------------------------------|
| Resources                            | Subham Patra                                                 |
| Supervision                          | Subham Patra                                                 |
| Validation                           | Subham Patra                                                 |
| Visualization                        | Subham Patra, Angana Mazumder                                |
| Writing – original draft preparation | Subham Patra                                                 |
| Writing – review & editing           | Subham Patra, Angana Mazumder, T Sumit Singha, Megh Kanvinde |

461

462

463 **Competing interests:**

464 The authors declare that they have no known competing financial interests or personal relationships  
465 that could have appeared to influence the work reported in this paper.

466

467 **Ethical statements:**

468 The data used in this study are public and have minimal risk to the individual users from this research.  
469 All students who participated in the survey were provided with participant information. Student  
470 identities have been anonymised throughout the study.

471

472 **Acknowledgements:**

473 We sincerely thank the two anonymous reviewers for their constructive critique. Authors  
474 acknowledge the Department of Earth Sciences, IIT Bombay for letting us use assets necessary for  
475 carrying out this study. Authors also thank all the anonymous students who participated in the survey  
476 for this project.

477

478 **References:**

479 Xu, L., Sanders, L., Li, K. and Chow, J.C., 2021. Chatbot for health care and oncology applications  
480 using artificial intelligence and machine learning: systematic review. *JMIR cancer*, 7(4), p.e27850.  
481 DOI: 10.2196/27850

482 Zawacki-Richter, O., Marín, V.I., Bond, M. and Gouverneur, F., 2019. Systematic review of research  
483 on artificial intelligence applications in higher education—where are the educators?. *International  
484 Journal of Educational Technology in Higher Education*, 16(1), pp.1-27. DOI: 10.1186/s41239-019-  
485 0171-0

486 Bengio, Y., Lecun, Y. and Hinton, G., 2021. Deep learning for AI. *Communications of the  
487 ACM*, 64(7), pp.58-65.

488 Steenbergen-Hu, S. and Cooper, H., 2014. A meta-analysis of the effectiveness of intelligent tutoring  
489 systems on college students' academic learning. *Journal of educational psychology*, 106(2), p.331.  
490 DOI: 10.1037/a0034752

491 Zhai, X., 2022. ChatGPT user experience: Implications for education. Available at SSRN 4312418.  
492 DOI: 10.2139/ssrn.4312418

493 Sallam, M., 2023. The utility of ChatGPT as an example of large language models in healthcare  
494 education, research and practice: Systematic review on the future perspectives and potential  
495 limitations. medRxiv, pp.2023-02. DOI: 10.1101/2023.02.19.23286155

496 Kasneci, E., Seßler, K., Küchemann, S., Bannert, M., Dementieva, D., Fischer, F., Gasser, U., Groh,  
497 G., Günemann, S., Hüllermeier, E. and Krusche, S., 2023. ChatGPT for good? On opportunities and  
498 challenges of large language models for education. *Learning and Individual Differences*, 103,  
499 p.102274. DOI: 10.1016/j.lindif.2023.102274

500 Gilson, A., Safranek, C.W., Huang, T., Socrates, V., Chi, L., Taylor, R.A. and Chartash, D., 2023.  
501 How does ChatGPT perform on the United States medical licensing examination? The implications  
502 of large language models for medical education and knowledge assessment. *JMIR Medical  
503 Education*, 9(1), p.e45312. DOI: 10.2196/45312

504 Hargreaves, S., 2023. ‘Words Are Flowing Out Like Endless Rain Into a Paper Cup’: ChatGPT &  
505 Law School Assessments. *The Chinese University of Hong Kong Faculty of Law Research Paper*,  
506 (2023-03). DOI: 10.2139/ssrn.4359407

507 Jiao, W., Wang, W., Huang, J.T., Wang, X. and Tu, Z.P., 2023. Is ChatGPT a good translator? Yes  
508 with GPT-4 as the engine. arXiv preprint arXiv:2301.08745. DOI: 10.48550/arXiv.2301.08745

509 Dong, Y. and Shi, L., 2021. Using Grammarly to support students’ source-based writing  
510 practices. *Assessing Writing*, 50, p.100564. DOI: 10.1016/j.asw.2021.100564

511 Choi, J.H., Hickman, K.E., Monahan, A. and Schwarcz, D., 2023. Chatgpt goes to law  
512 school. Available at SSRN. DOI: 10.2139/ssrn.4335905

513 Cotton, D.R., Cotton, P.A. and Shipway, J.R., 2023. Chatting and cheating: Ensuring academic  
514 integrity in the era of ChatGPT. *Innovations in Education and Teaching International*, pp.1-12. DOI:  
515 10.1080/14703297.2023.2190148

516 Khalil, M. and Er, E., 2023. Will ChatGPT get you caught? Rethinking of plagiarism detection. arXiv  
517 preprint arXiv:2302.04335. DOI: 10.48550/arXiv.2302.04335

518 Jiao, W., Wang, W., Huang, J.T., Wang, X. and Tu, Z., 2023. Is ChatGPT a good translator? A  
519 preliminary study. arXiv preprint arXiv:2301.08745. DOI: 10.48550/arXiv.2301.08745

520 Schulte, P., Alegret, L., Arenillas, I., Arz, J.A., Barton, P.J., Bown, P.R., Bralower, T.J., Christeson,  
521 G.L., Claeys, P., Cockell, C.S. and Collins, G.S., 2010. The Chicxulub asteroid impact and mass  
522 extinction at the Cretaceous-Paleogene boundary. *Science*, 327(5970), pp.1214-1218. DOI:  
523 10.1126/science.1177265

524 Keller, G., Mateo, P., Monkenbusch, J., Thibault, N., Punekar, J., Spangenberg, J.E., Abramovich,  
525 S., Ashckenazi-Polivoda, S., Schoene, B., Eddy, M.P. and Samperton, K.M., 2020. Mercury linked  
526 to Deccan Traps volcanism, climate change and the end-Cretaceous mass extinction. *Global and  
527 Planetary Change*, 194, p.103312. DOI: 10.1016/j.gloplacha.2020.103312

528 Farrokhnia, M., Banihashem, S.K., Noroozi, O. and Wals, A., 2023. A SWOT analysis of ChatGPT:  
529 Implications for educational practice and research. *Innovations in Education and Teaching  
530 International*, pp.1-15. DOI: 10.1080/14703297.2023.2195846 CrossMark

531 Lo, C.K., 2023. What is the impact of ChatGPT on education? A rapid review of the literature.  
532 *Education Sciences*, 13(4), p.410. DOI: 10.3390/educsci13040410

533 Elbanna, S. and Armstrong, L., 2023. Exploring the integration of ChatGPT in education: adapting  
534 for the future. *Management & Sustainability: An Arab Review*. DOI: 10.1108/MSAR-03-2023-0016

535 Li, L., Ma, Z., Fan, L., Lee, S., Yu, H. and Hemphill, L., 2023. ChatGPT in education: A discourse  
536 analysis of worries and concerns on social media. arXiv preprint arXiv:2305.02201. DOI:  
537 10.48550/arXiv.2305.02201



538 Tlili, A., Shehata, B., Adarkwah, M.A., Bozkurt, A., Hickey, D.T., Huang, R. and Agyemang, B.,  
539 2023. What if the devil is my guardian angel: ChatGPT as a case study of using chatbots in education.  
540 Smart Learning Environments, 10(1), p.15. DOI: 10.1186/s40561-023-00237-x

541 Baidoo-Anu, D. and Owusu Ansah, L., 2023. Education in the era of generative artificial intelligence  
542 (AI): Understanding the potential benefits of ChatGPT in promoting teaching and learning. Available  
543 at SSRN 4337484.

544 Ausat, A.M.A., Massang, B., Efendi, M., Nofirman, N. and Riady, Y., 2023. Can chat GPT replace  
545 the role of the teacher in the classroom: A fundamental analysis. Journal on Education, 5(4),  
546 pp.16100-16106. DOI: 10.31004/joe.v5i4.2745

547 Fauzi, F., Tuhuteru, L., Sampe, F., Ausat, A.M.A. and Hatta, H.R., 2023. Analysing the role of  
548 ChatGPT in improving student productivity in higher education. Journal on Education, 5(4),  
549 pp.14886-14891. DOI: 10.31004/joe.v5i4.2563

550 Zen, A., Kusumastuti, R., Metris, D., Gadzali, S.S. and Ausat, A.M.A., 2023. Implications of  
551 Entrepreneurship Education as a Field of Study for Advancing Research and Practice. Journal on  
552 Education, 5(4), pp.11441-11453. DOI: 10.31004/joe.v5i4.2091

553 Cooper, G., 2023. Examining science education in chatgpt: An exploratory study of generative  
554 artificial intelligence. Journal of Science Education and Technology, 32(3), pp.444-452. DOI:  
555 10.1007/s10956-023-10039-y

556 Herft, A., 2023. A Teacher's Prompt Guide to ChatGPT aligned with 'What Works Best'.

557 Haleem, A., Javaid, M., Qadri, M.A. and Suman, R., 2022. Understanding the role of digital  
558 technologies in education: A review. Sustainable Operations and Computers, 3, pp.275-285. DOI:  
559 10.1016/j.susoc.2022.05.004

560 Salas-Pilco, S.Z., Xiao, K. and Hu, X., 2022. Artificial intelligence and learning analytics in teacher  
561 education: A systematic review. Education Sciences, 12(8), p.569. DOI: 10.3390/educsci12080569

562 Hwang, G.J. and Chang, C.Y., 2021. A review of opportunities and challenges of chatbots in  
563 education. *Interactive Learning Environments*, pp.1-14. DOI: 10.1080/10494820.2021.1952615

564 Bašić, Ž., Banovac, A., Kružić, I. and Jerković, I., 2023. Better by You, better than Me? ChatGPT-3  
565 as writing assistance in students' essays. DOI: 10.48550/arXiv.2302.04536

566 Liebrez, M., Schleifer, R., Buadze, A., Bhugra, D. and Smith, A., 2023. Generating scholarly content  
567 with ChatGPT: ethical challenges for medical publishing. *The Lancet Digital Health*, 5(3), pp.e105-  
568 e106. DOI: 10.1016/S2589-7500(23)00019-5

569 Yang, M., 2023. New York City schools ban AI chatbot that writes essays and answers prompts. *The*  
570 *Guardian*, 6.
